# Supplementary material
Source: PubMed Central journal article supplement (PMC4161187)
Supplement: Supp_Fig1.pdf [file Supp_Fig1.pdf]

## Supplementary Data

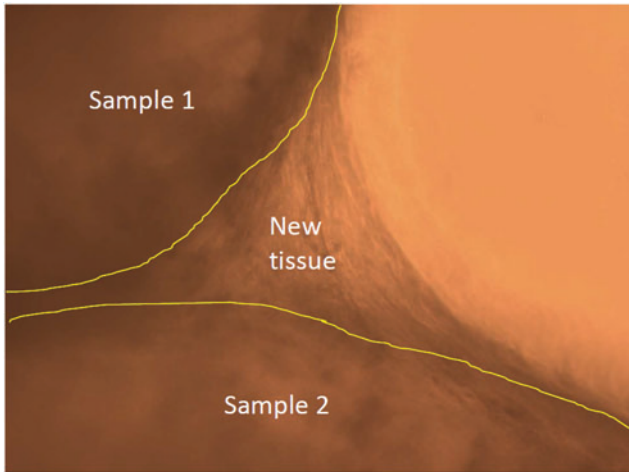

**SUPPLEMENTARY FIG. S1.** Human-bone-marrow-derived mesenchymal stem cell-laden mGL scaffolds cultured for 6 weeks. After 6 weeks of culture in chondrogenic medium, the three individual constructs fused with each other without visually distinguishable boundaries (yellow lines indicate the original borders of each construct).
